# Supplementary material
Source: PubMed Central journal article supplement (PMC8647838)
Supplement: NIHMS1753330-supplement-1.pdf [file NIHMS1753330-supplement-1.pdf]

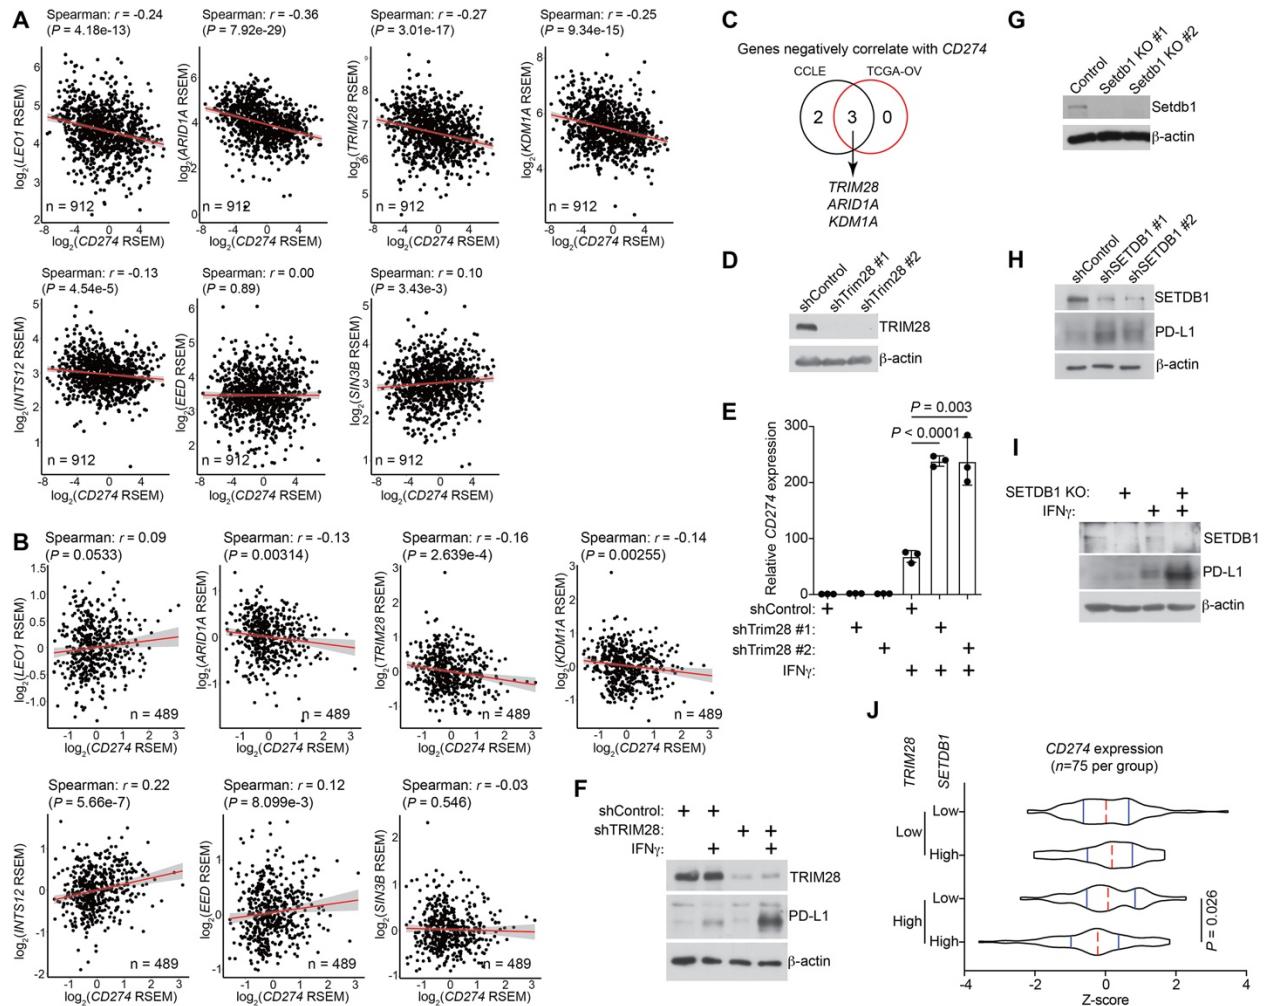

**Supplementary Figure 1: Trim28 is a negative regulator of PD-L1 expression. A-C,** Correlations between expression of the indicated top hits from the screen with *CD274* expression in Broad Institute Cancer Cell Line Encyclopedia (CCLE) dataset (**A**) or TCGA ovarian cancer dataset (**B**). And the overlap between these two analyses reveals the indicated three hits whose expression negatively correlates with *CD274* expression (**C**). **D**, Confirmation of Trim28 knockdown in ID8 cells by the indicated shRNAs determined by immunoblot.  $\beta$ -actin was used as a loading control. **E**, Expression of *CD274* in control and the indicated shTrim28 ID8 cells treated with or without 30 ng/ml IFN $\gamma$  for 24 h determined RT-qPCR.  $n = 3$  biologically independent experiments. **F**, Expression of TRIM28, PD-L1 and a loading control  $\beta$ -actin in OVCAR3 human ovarian cancer cell lines expressing shControl or shTRIM28 treated with or without 30 ng/ml IFN $\gamma$  for 24 h determined by immunoblot. **G**, Validation of Setdb1 knockout in ID8 cells determined by immunoblot.  $\beta$ -actin was used as a loading control. **H**, Expression of SETDB1, PD-L1 and a loading control  $\beta$ -actin in OVCAR3 human ovarian cancer cell lines expressing shControl or the indicated shTRIM28. **I**, Expression of SETDB1, PD-L1 and a loading control  $\beta$ -actin in control and SETDB1 knockout OVCAR3 human ovarian cancer cell lines treated with or without 30 ng/ml IFN $\gamma$  for 24 h determined by immunoblot. **J**, *CD274* expression in the indicated groups based on TCGA ovarian cancer dataset. Data represent mean  $\pm$  SEM.  $P$  values were calculated using a two-tailed student  $t$  test in S1E and by Spearman analysis in S1A-B.

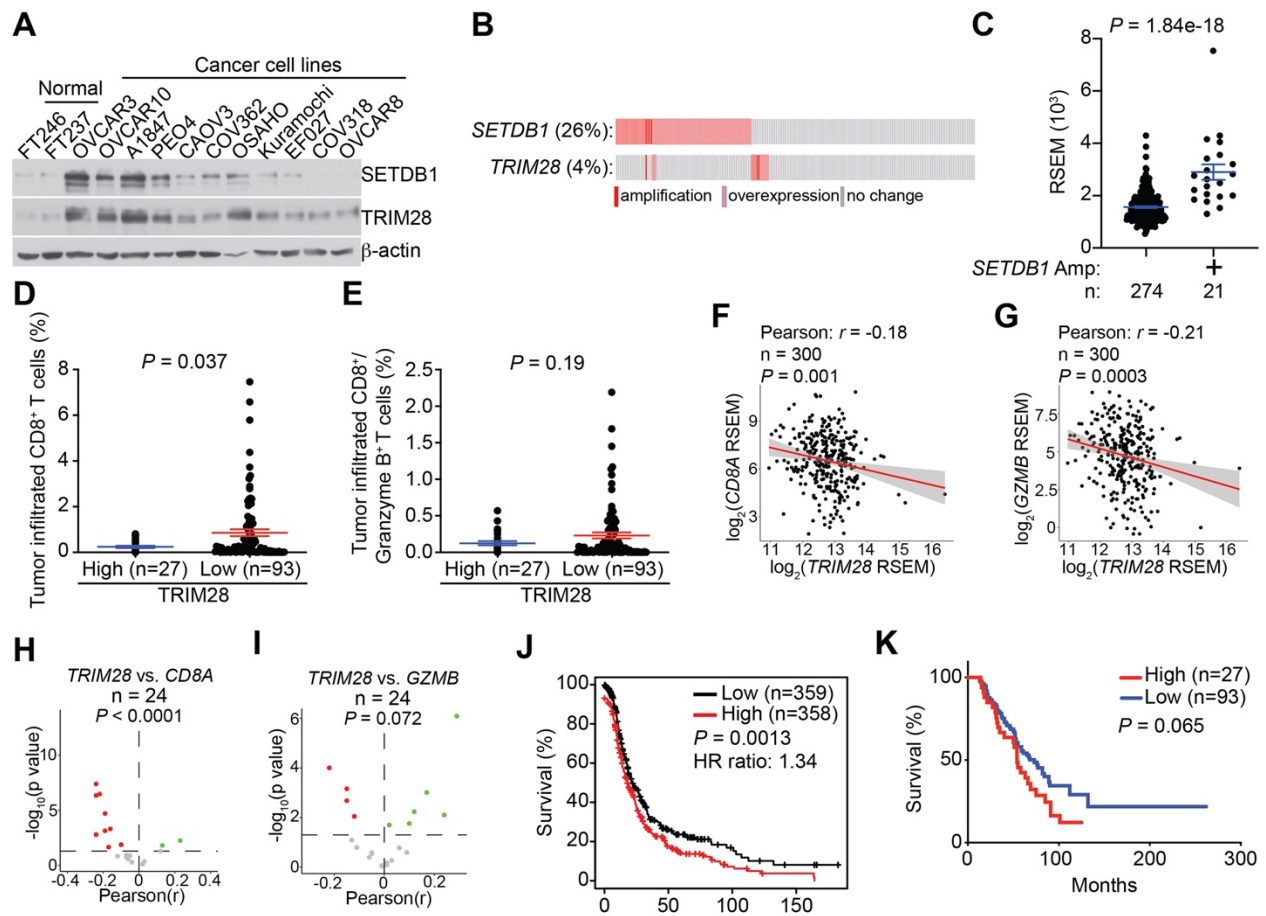

**Supplementary Figure 2: TRIM28 expression negatively correlates with effector CD8<sup>+</sup> T cell infiltration.** **A**, Expression of SETDB1, TRIM28 and a loading control  $\beta$ -actin in the indicated normal fallopian tube epithelial cells and high-grade serous ovarian cancer cell lines determined by immunoblot. **B**, SETDB1 amplification and overexpression profile in the TCGA HGSOV dataset. **C**, Expression of SETDB1 in the TCGA HGSOV cases with or without SETDB1 amplification. **D-E**, High SETDB1 expression correlates with a lower tumor infiltrated CD8<sup>+</sup> T cells (D) and Granzyme B<sup>+</sup>/CD8<sup>+</sup> T cells (E). **F-G**, Negative correlation between TRIM28 and CD8A (F) or GZMB (F) based on RNA-seq analysis in the TCGA HGSOV dataset. **H-I**, Significant negative correlation between TRIM28 and CD8A (H) or GZMB (I) expression based on RNA-seq analysis from 24 TCGA cancer types with at least 100 patients. **J**, Kaplan-Meier survival of SETDB1 high and low patients from a publicly microarray dataset (7). **K**, Overall survival of patients with high or low TRIM28 from the tumor microarray based on Kaplan-Meier analysis.  $P$  values were calculated using a two-tailed student  $t$  test except S2F-G by Pearson  $r$  analysis and S2J-K by log rank test.

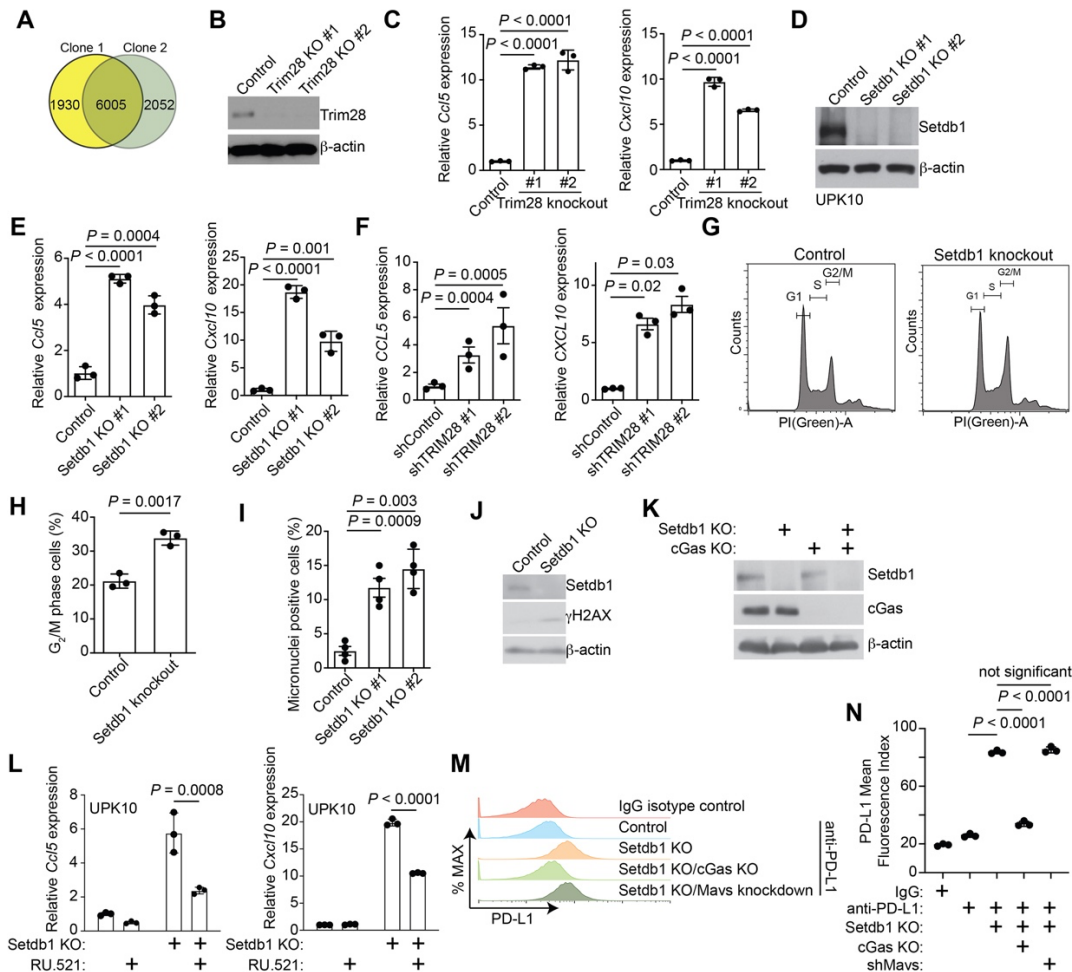

**Supplementary Figure 3: SETDB1-TRIM28 loss activates the cGAS-STING pathway. A**, Overlap of differentially expressed genes (DEGs) in two Setdb1 knockout clones compared with control ID8 cells. **B**, Validation of Trim28 knockout in the indicated ID8 cells determined by immunoblot.  $\beta$ -actin was used as a loading control. **C**, Expression of *Ccl5* and *Cxcl10* in control and the indicated Trim28 knockout ID8 cells determined by RT-qPCR analysis. **D**, Expression of Setdb1 and a loading control  $\beta$ -actin in the indicated UPK10 cell lines determined by immunoblot. **E**, Expression of *Ccl5* and *Cxcl10* in control and the indicated Setdb1 knockout UPK10 cells determined by RT-qPCR analysis. **F**, Expression of *CCL5* and *CXCL10* in control and the indicated TRIM28 knockdown OVCAR3 cells determined by RT-qPCR analysis. **G-H**, Cell cycle profile of control and Setdb1 knockout ID8 cell lines determined by flow cytometry (G). And percentage of G<sub>2</sub>/M cell cycle in the indicated cells was quantified (H). **I**, Percentage of micronuclei positive cells from the indicated control or Setdb1 knockout UPK10 cells was quantified. **J**, Expression of Setdb1,  $\gamma$ H2AX and a loading control  $\beta$ -actin in the indicated ID8 cell lines determined by immunoblot. **K**, Expression of Setdb1, cGas and a loading control  $\beta$ -actin in the indicated ID8 cell lines determined by immunoblot. **L**, Expression of *Ccl5* and *Cxcl10* in control and the indicated Setdb1 knockout UPK10 cells treated with or without cGAS inhibitor RU.521 (2.5  $\mu$ g/ml for 48 h) determined by RT-qPCR analysis. **M**, Expression of PD-L1 was determined by FACS analysis in control, Setdb1 knockout, Setdb1 knockout/cGas knockout and Setdb1/Mavs knockdown ID8 cells. An isotype matched IgG was used as a negative control. **N**, Quantification of M, the mean fluorescence index of PD-L1 was determined. Data represent mean  $\pm$  SEM,  $n = 3$  biologically independent experiments.  $P$  values were calculated using a two-tailed student  $t$  test.

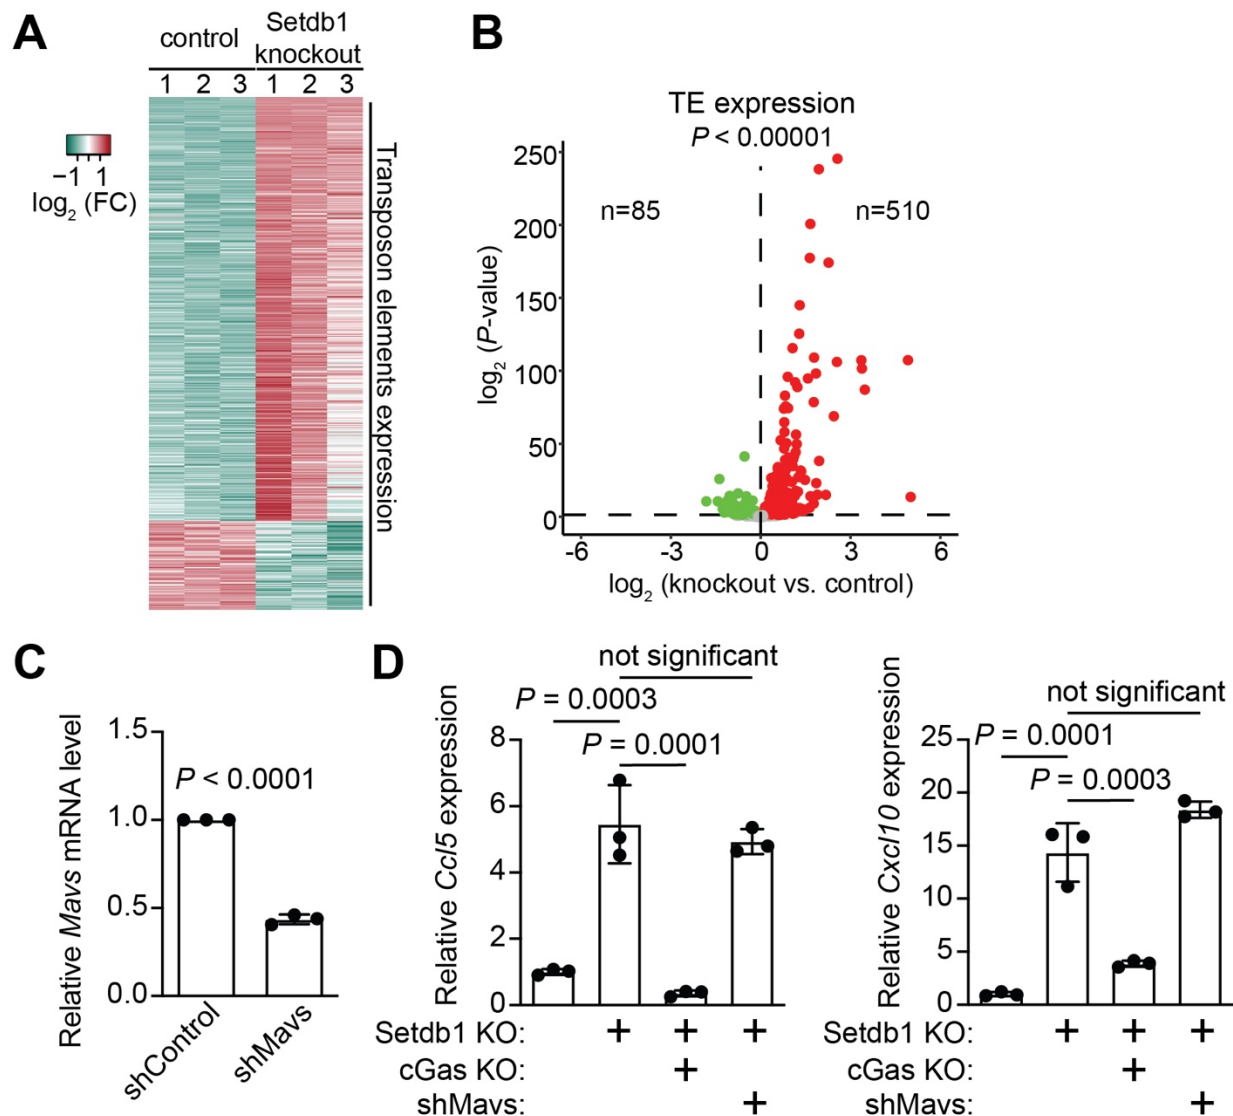

**Supplementary Figure 4: *Mavs* knockdown does not affect expression of *Ccl5* or *Cxcl10* induced by *Setdb1* knockout.** **A**, Heatmap of differentially expressed TEs ( $n = 490$ ) with  $P$  value  $< 0.05$  and FDR  $< 5\%$ . **B**, Volcano plot illustrating the TEs upregulated (red) or downregulated (green) up *Setdb1* knockout. **C**, Confirmation of *Mavs* knockdown by shRNA in ID8 cells using RT-qPCR analysis. **D**, Expression of *Ccl5* and *Cxcl10* in the indicated ID8 cells was determined by RT-qPCR analysis. Data represent mean  $\pm$  SEM,  $n = 3$  biologically independent experiments.  $P$  values were calculated using a two-tailed student  $t$  test except S4B by Fisher's Exact Test.

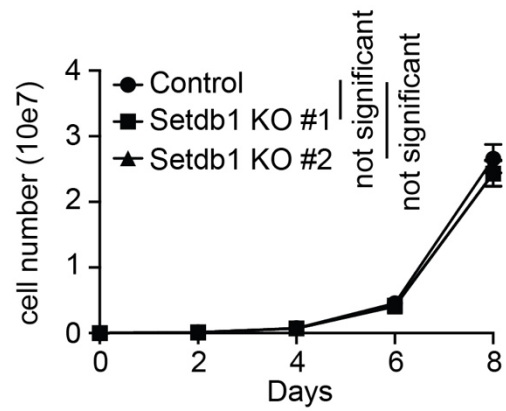

**Supplementary Figure 5: Setdb1 knockout does not significantly affect the growth of ID8 cells.** Cell growth curves for the indicated control or Setdb1 knockout ID8 cells.  $n = 3$  biologically independent experiments.  $P$  values were calculated using a two-way ANOVA.
